# Supplementary material for: Hypoxia-alleviated sonodynamic therapy based on a hybrid protein oxygen carrier to enhance tumor inhibition
Source: Royal Society of Chemistry journal article supplement (doi:10.1039/d1bm01710a), 2021-12-02
Supplement: d1bm01710a1.pdf [file d1bm01710a1.pdf]

Supporting Information

**Hypoxia-Alleviated Sonodynamic Therapy based on Hybrid Protein  
Oxygen Carrier to Enhance Tumor Inhibition**

*Ting Yin<sup>1,2,‡</sup>, Jia Yin<sup>2,‡</sup>, Hui Ran<sup>1,2</sup>, Yaguang Ren<sup>2</sup>, Chengyu Lu<sup>1</sup>, Lanlan Liu<sup>2</sup>, Qingxia Shi<sup>1,2</sup>, Yuzhi Qiu<sup>1</sup>, Hong Pan<sup>2,\*</sup> and Aiqing Ma<sup>1,2,\*</sup>*

<sup>1</sup>Guangdong Key Laboratory for Research and Development of Natural Drugs, Key Laboratory for Nanomedicine, Guangdong Medical University, Dongguan 523808, PR China.

<sup>2</sup>Guangdong Key Laboratory of Nanomedicine, CAS-HK Joint Lab of Biomaterials, Shenzhen Engineering Laboratory of Nanomedicine and Nanoformulations, Institute of Biomedicine and Biotechnology, Shenzhen Institute of Advanced Technology (SIAT), Chinese Academy of Sciences, Shenzhen 518055, P.R. China.

\*Corresponding Authors: H. Pan ([hong.pan@siat.ac.cn](mailto:hong.pan@siat.ac.cn)) and A. Ma ([maqandght@126.com](mailto:maqandght@126.com))

‡ These authors contributed equally to this work.

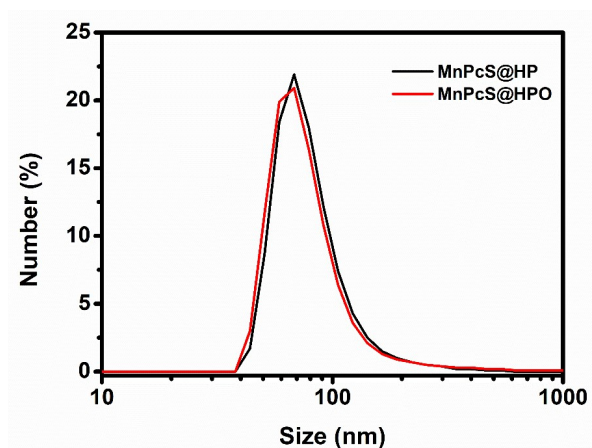

**Figure S1** DLS of MnPcS@HP NPs, suggesting the high uniform sizes of the NPs.

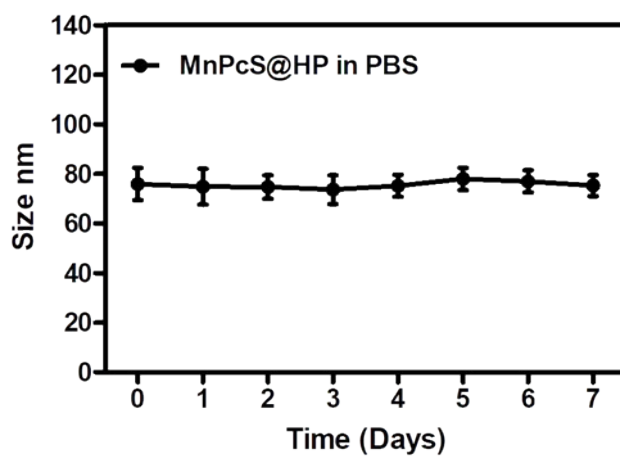

**Figure S2** The mean size of the the MnPcS@HP NPs in 7 days in PBS solution.

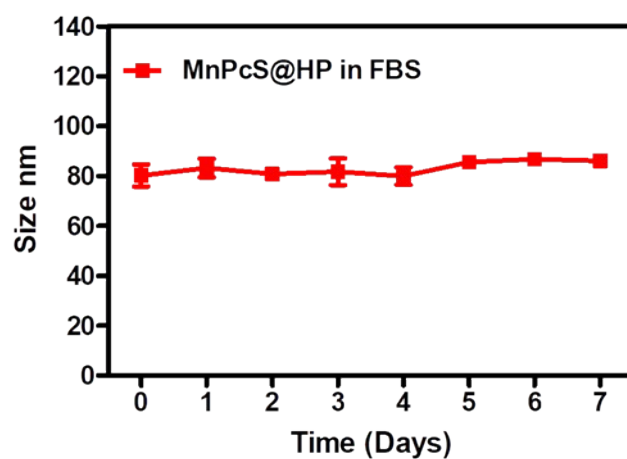

**Figure S3** The mean size of the the MnPcS@HP NPs in 7 days in FBS solution.

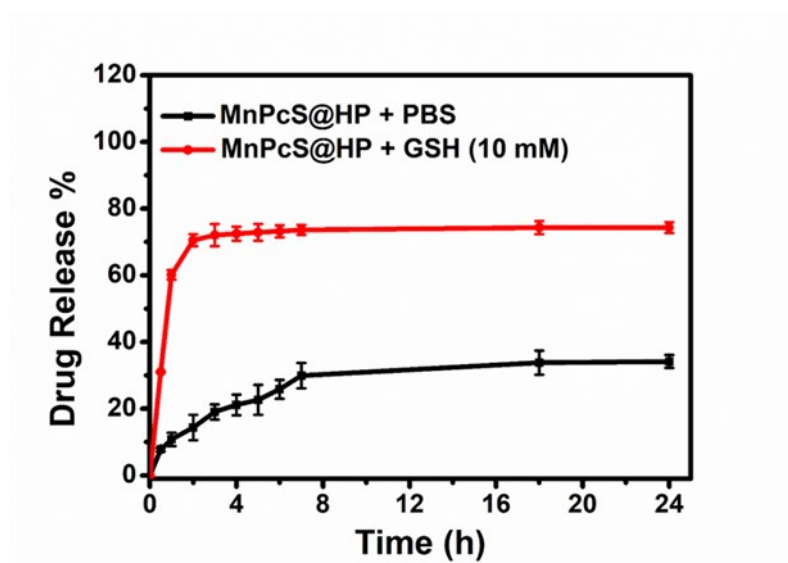

**Figure S4** The release curve in PBS solution and PBS solution with 10 mM GSH.
